# Supplementary material for: High Conductivity, Semiconducting, and Metallic PEDOT:PSS Electrode for All-Plastic Solar Cells
Source: MDPI journal article supplement (doi:10.3390/molecules28062836), 2023-03-21
Supplement: s1 [file s1]

# High Conductivity, Semiconducting, and Metallic PEDOT:PSS

## Electrode for All-Plastic Solar Cells

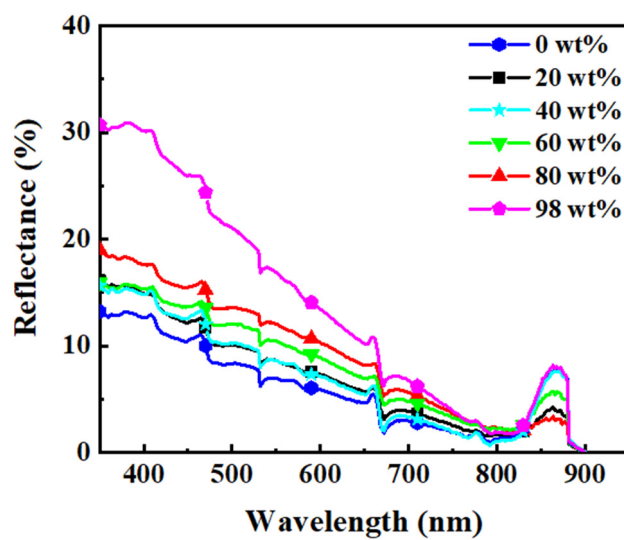

Figure S1. Diffused surface reflectance spectra of PEDOT:PSS films treated by  $\text{H}_2\text{SO}_4$  with different concentrations (0 wt%, 20 wt%, 40 wt%, 60 wt%, 80 wt%, 98 wt%).
